# Supplementary material
Source: Springer Nature journal article supplement (https://www.springermedizin.de/resource/supplementary/12985_2009_789_MOESM4_ESM.pdf/9609196)

**A**

|        | Mock | HCV-hyg-Rep<br>cl 2 (Spe1 cut) | HCV-hyg-Rep<br>cl 3 (Spe1 cut) | HCV-hyg-Rep<br>cl 1 (Sca1 cut) | HCV-hyg-Rep<br>cl 8 (Sca1 cut) |
|--------|------|--------------------------------|--------------------------------|--------------------------------|--------------------------------|
| Huh7   | -    | -                              | +                              | ++                             | -                              |
| Huh7D  | -    | +++                            | +++++                          | +++++                          | +++                            |
| Huh7.5 | -    | -                              | +++++                          | +++++                          | ++++                           |

**B**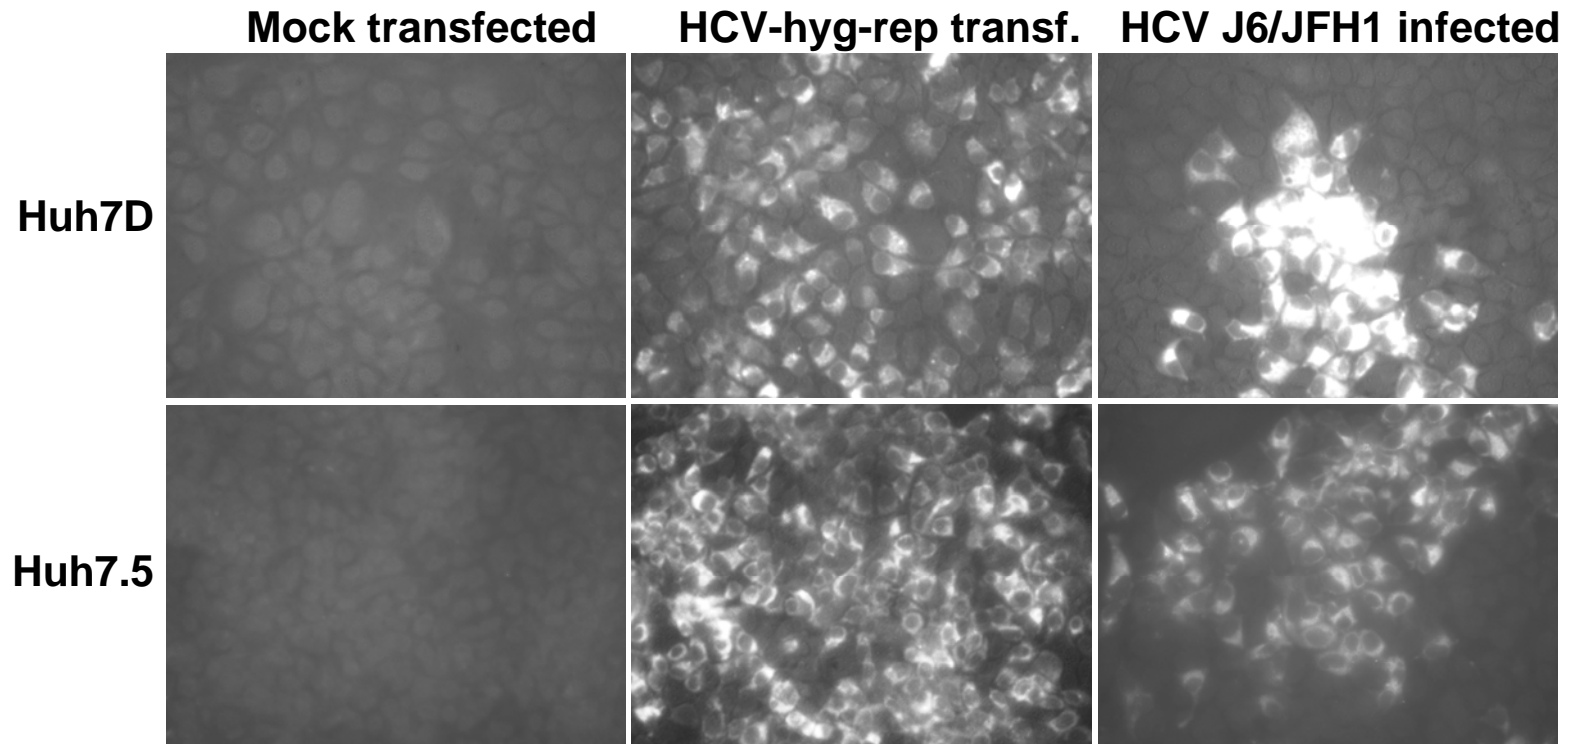

Supplement: MOESM4 [file 9609196]
